# Supplementary material for: Delta-Radiomics Predicts Response to First-Line Oxaliplatin-Based Chemotherapy in Colorectal Cancer Patients with Liver Metastases
Source: Cancers (Basel). 2022 Jan 4;14(1):241. doi: 10.3390/cancers14010241 (PMC8750408; doi:10.3390/cancers14010241)
Supplement: Supplementary file 1 [file cancers-14-00241-s001.zip › cancers-1531682-supplementary.pdf]

**Table S1.** Reporting Guidelines: from Image processing to features calculation steps.

| Area                                                | Topic                      | Description                                                                                       |
|-----------------------------------------------------|----------------------------|---------------------------------------------------------------------------------------------------|
| Patient                                             | Region of interest         | Liver metastases                                                                                  |
| Acquisition                                         | Acquisition protocol       | Different acquisition protocols (2 centers)                                                       |
|                                                     | Scanner type               | Center A: Siemens, Somaton Definition/ Sensation 64<br>Center B: Siemens Somaton Definition FLASH |
|                                                     | Imaging modality           | TC                                                                                                |
|                                                     | Scan duration              | Approximately 10/15 minutes                                                                       |
| Image registration                                  | Registration method        | NONE                                                                                              |
| Data conversion                                     | Not applicable             | NONE                                                                                              |
| Post-acquisition processing                         | Anti-aliasing              | NONE                                                                                              |
|                                                     | Non-uniformity correction  | NONE                                                                                              |
|                                                     | Intensity normalization    | NONE                                                                                              |
| Segmentation                                        | Method                     | Manual segmentation performed on portal-phase CT scan                                             |
|                                                     | Conversion to mask         | NIFTI                                                                                             |
| Image Interpolation                                 | Interpolation method       | NONE                                                                                              |
| Mask Interpolation                                  | Interpolation method       | NONE                                                                                              |
| Re-segmentation                                     | Method                     | Between 1 <sup>st</sup> and 99 <sup>th</sup> percentile                                           |
| Discretization                                      | Method                     | Fixed bin number (32 bin)                                                                         |
| Image transformation                                | Image filter               | NONE                                                                                              |
| Image biomarker computation                         | Biomarker set              | Shape-based, First-order statistics, GLCM, GLRLM, GLSZM, NGTDM, GLDM                              |
|                                                     | IBSI compliance            | Yes                                                                                               |
|                                                     | Software availability      | Pyradiomics                                                                                       |
| Image biomarker computation<br>- texture parameters | Texture matrix aggregation | 2D averaged                                                                                       |
|                                                     | Distance weighting         | No weighting                                                                                      |
|                                                     | CM symmetry                | Symmetric co-occurrence matrices                                                                  |
|                                                     | CM distance                | 1                                                                                                 |
| List of features                                    | First-order statistics     | Energy<br>total energy                                                                            |

|             |                                                                                                                                                                                                                                                                                                                                                                                                                                                                                                                                                                       |
|-------------|-----------------------------------------------------------------------------------------------------------------------------------------------------------------------------------------------------------------------------------------------------------------------------------------------------------------------------------------------------------------------------------------------------------------------------------------------------------------------------------------------------------------------------------------------------------------------|
|             | entropy<br>minimum<br>10 <sup>th</sup><br>90 <sup>th</sup><br>Maximum<br>Mean<br>Median<br>interquartile range<br>range<br>mean absolute deviation<br>robust mean absolute deviation<br>root mean squared<br>skewness<br>kurtosis<br>variance<br>uniformity                                                                                                                                                                                                                                                                                                           |
| Shape-based | Elongation<br>Flatness<br>Least Axis Length<br>Major Axis Length<br>Maximum 2D Diameter Column<br>Maximum 2D Diameter Row<br>Maximum 2D Diameter Slice<br>Maximum3DDiameter<br>Mesh Volume<br>Minor Axis Length<br>Sphericity<br>Surface Area<br>Surface Volume Ratio<br>Voxel Volume                                                                                                                                                                                                                                                                                 |
| GLCM        | Autocorrelation<br>Cluster Prominence<br>Cluster Shade<br>Cluster Tendency<br>Contrast<br>Correlation<br>Difference Average<br>Difference Entropy<br>Difference Variance<br>Inverse Difference<br>Normalized Inverse Difference<br>Inverse Difference Moment<br>Normalized Inverse Difference Moment<br>Informational Measure of Correlation 1<br>Informational Measure of Correlation 2<br>Inverse Variance<br>Joint Average<br>Joint Energy<br>Joint Entropy<br>Maximal Correlation Coefficient<br>Maximum Probability<br>Sum Average<br>Sum Entropy<br>Sum Squares |
| GLRLM       | Gray Level Non-Uniformity<br>Gray Level Non-Uniformity Normalized<br>Gray Level Variance<br>High Gray Level Run Emphasis<br>Long Run Emphasis                                                                                                                                                                                                                                                                                                                                                                                                                         |

|  |                                           |
|--|-------------------------------------------|
|  | Long Run High Gray Level Emphasis         |
|  | Long Run Low Gray Level Emphasis          |
|  | Low Gray Level Run Emphasis               |
|  | Run Entropy                               |
|  | Run Length Non-Uniformity                 |
|  | Run Length Non-Uniformity Normalized      |
|  | Run Percentage                            |
|  | Run Variance                              |
|  | Short Run Emphasis                        |
|  | Gray Level Non-Uniformity                 |
|  | Gray Level Non-Uniformity Normalized      |
|  | Gray Level Variance                       |
|  | High Gray Level Zone Emphasis             |
|  | Large Area Emphasis                       |
|  | Large Area High Gray Level Emphasis       |
|  | Large Area Low Gray Level Emphasis        |
|  | Low Gray Level Zone Emphasis              |
|  | Size Zone Non-Uniformity                  |
|  | Size Zone Non-Uniformity Normalized       |
|  | Small Area Emphasis                       |
|  | Small Area High Gray Level Emphasis       |
|  | Small Area Low Gray Level Emphasis        |
|  | Zone Entropy                              |
|  | Busyness                                  |
|  | Coarseness                                |
|  | Complexity                                |
|  | Contrast                                  |
|  | Strength                                  |
|  | Dependence Entropy                        |
|  | Dependence Non-Uniformity                 |
|  | Dependence Non-Uniformity Normalized      |
|  | Dependence Variance                       |
|  | Gray Level Non-Uniformity                 |
|  | Gray Level Variance                       |
|  | High Gray Level Emphasis                  |
|  | Large Dependence Emphasis                 |
|  | Large Dependence High Gray Level Emphasis |
|  | Large Dependence Low Gray Level Emphasis  |
|  | Low Gray Level Emphasis                   |
|  | Small Dependence Emphasis                 |
|  | Small Dependence High Gray Level Emphasis |
|  | Small Dependence Low Gray Level Emphasis  |

Table S2. Performances of other ML techniques on both training and validation sets.

|                       | Train             |                  |                  |                   |                   | Validation        |                  |                  |                   |                   |
|-----------------------|-------------------|------------------|------------------|-------------------|-------------------|-------------------|------------------|------------------|-------------------|-------------------|
|                       | ACC %<br>(95% CI) | SE %<br>(95% CI) | SP %<br>(95% CI) | PPV %<br>(95% CI) | NPV %<br>(95% CI) | ACC %<br>(95% CI) | SE %<br>(95% CI) | SP %<br>(95% CI) | PPV %<br>(95% CI) | NPV %<br>(95% CI) |
| Decision Tree         | 97<br>(89-100)    | 99<br>(94-99)    | 94<br>(85-98)    | 95<br>(89-98)     | 99<br>(91-100)    | 86<br>(81-92)     | 85<br>(68-95)    | 92<br>(78-98)    | 90<br>(76-96)     | 87<br>(75-94)     |
| LR Step-wise binomial | 81.5<br>(77-84)   | 79<br>(73-81)    | 84<br>(73-85)    | 86<br>(72-90)     | 76<br>(73-80)     | 63<br>(55-69)     | 61<br>(50-65)    | 65<br>(51-70)    | 61<br>(50-65)     | 65<br>(50-65)     |
| LR Step-wise poisson  | 78.5<br>(73-81)   | 79<br>(73-81)    | 78<br>(72-82)    | 81<br>(74-83)     | 74<br>(71-80)     | 77.5<br>(69-84)   | 82<br>(70-85)    | 73<br>(68-79)    | 73<br>(69-79)     | 82<br>(69-85)     |
| SVM Linear            | 79                | 84               | 73.5             | 80                | 61                | 67.5              | 67.5             | 67.5             | 62.5              | 67.5              |

|        | (71-83) | (72-85) | (71-81) | (71-84) | (56-67) | (58-75) | (58-71) | (61-75) | (55-68) | (61-75) |
|--------|---------|---------|---------|---------|---------|---------|---------|---------|---------|---------|
| Random | 93      | 94      | 92      | 94      | 92      | 75      | 64      | 86      | 80      | 72      |
| Forest | (88-96) | (84-96) | (83-94) | (86-97) | (81-99) | (67-81) | (55-71) | (71-89) | (71-89) | (65-83) |

LR: logistic regression, ACC: accuracy, SE: sensitivity, SP: specificity, PPV: positive predictive value, NPV: negative predictive value.

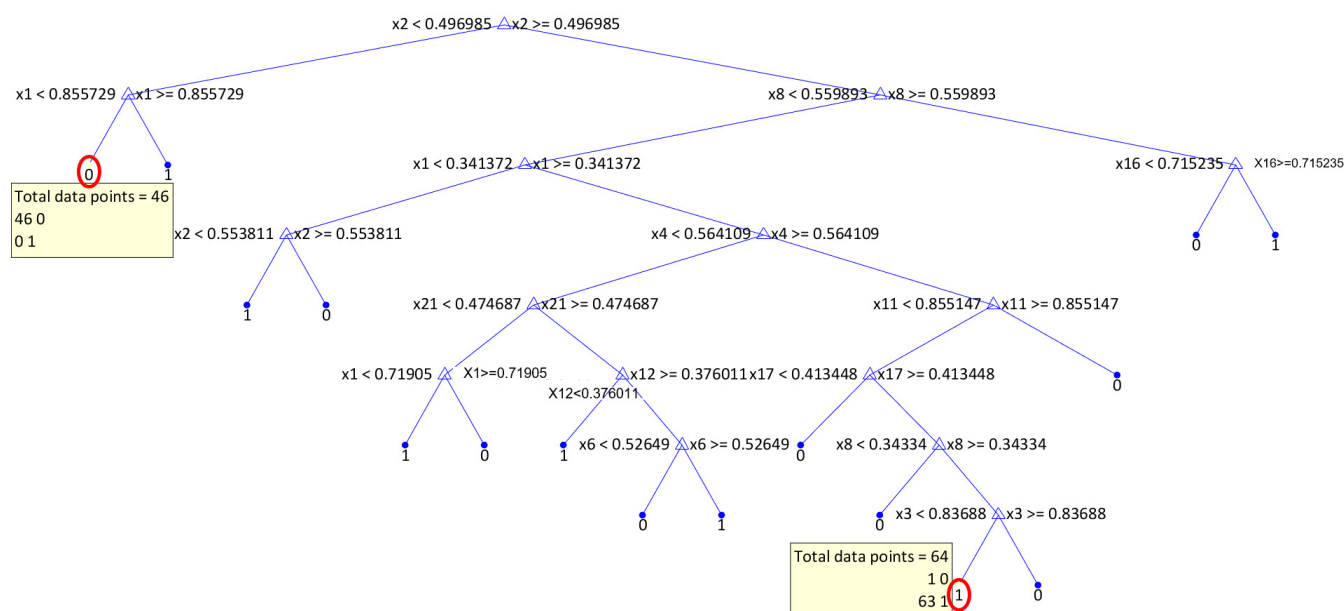

**Figure S1.** Trained Decision Tree containing the 11 selected features: shape Sphericity (named x1 in Figure 2), shape Surface Volume Ratio (x2), GLCM Contrast (x3), GLCM Difference Average (x4), GLCM Difference Variance (x6), GLCM Maximum Probability (x8), GLDM Small Dependence Low Gray Level Emphasis (x11), GLRLM Run Length Non Uniformity Normalized (x12), GLSZM Size Zone Non Uniformity Normalized (x16), GLSZM Small Area Emphasis (x17), and NGTDM Complexity (x21). 46 non responder lesions in the training set (27%) were correctly classified using only 2 variables (shape sphericity and shape surface volume ratio). In particular, if the value of both features was lower than the threshold computed by the model, these lmCRC were classified as non-responder. Conversely, to classify a lesion as R+ more features were needed, as it is visible from the last leaf of the DT, that classifies 63 lesions as R+.

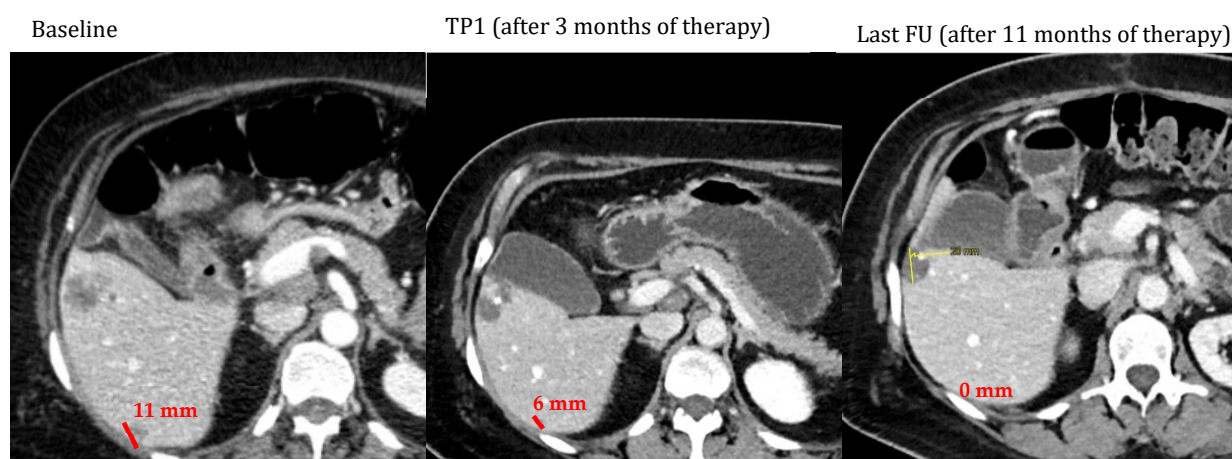

**Figure S2.** Lesion 1 in patient 1010 at baseline, TP1 and last FU during first-line chemotherapy. Lesion 1 was a good responder misclassified as R- by the algorithm (CR at 11 months). Probably, small size could have hindered a correct segmentation in this case.

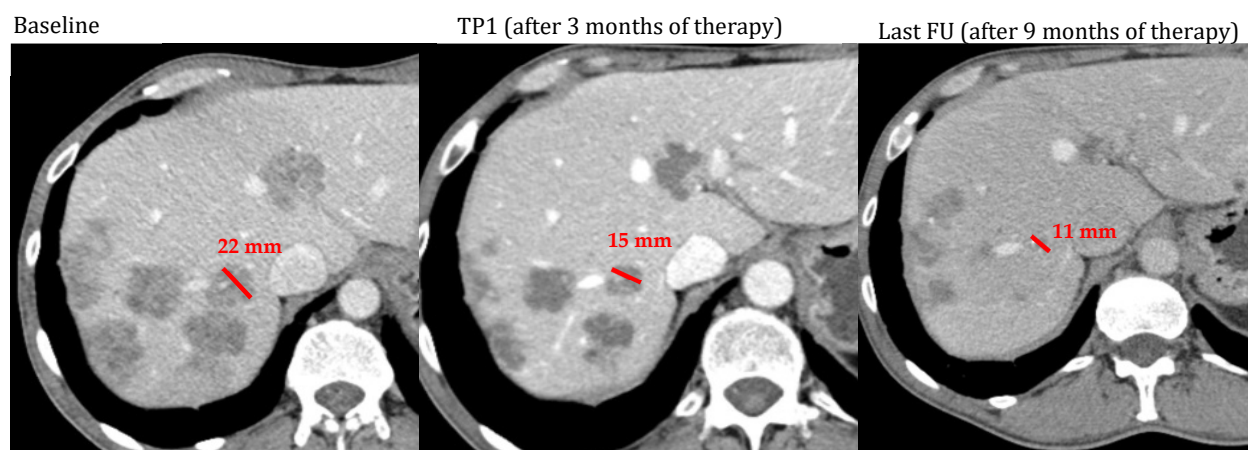

**Figure S3.** Lesion 4 in patient 1016 at baseline, TP1 and last FU during first-line chemotherapy. This metastasis was a good responder misclassified as R- by the algorithm (PR at 9 months).

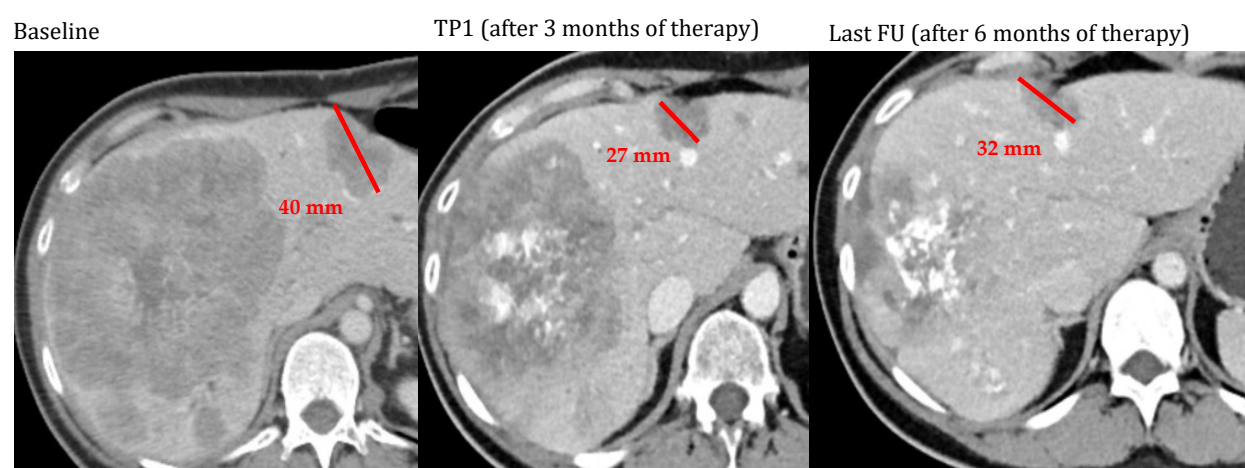

(a)

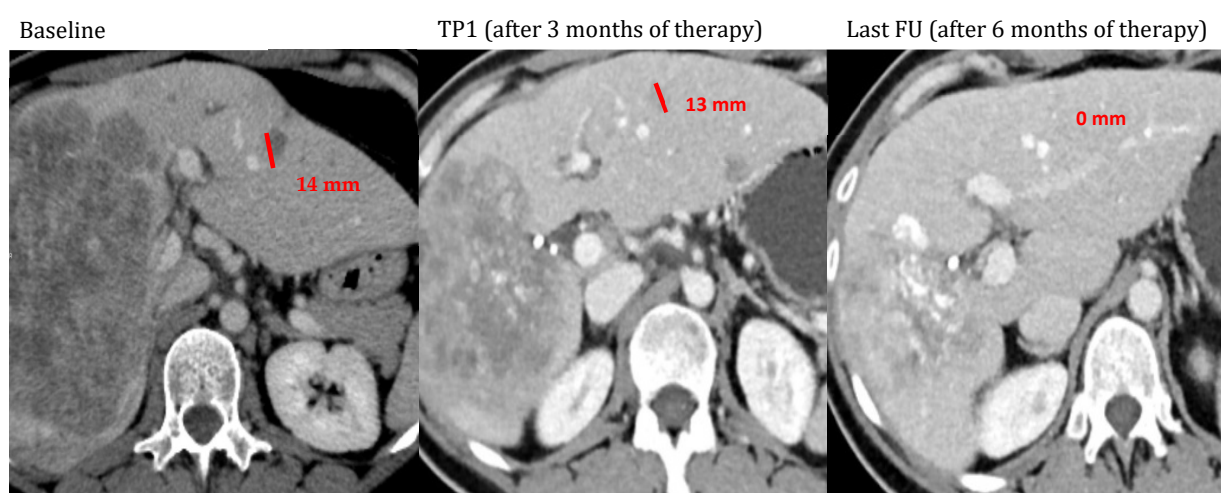

(b)

**Figure S4.** (a) Lesion 2 in patient 1017 at baseline, TP1 and last FU during first-line chemotherapy. Lesion 2 was a bad responder misclassified as R+ by the algorithm (PD at 6 months). (b) Lesion 4 in patient 1017 at baseline, TP1 and last FU during first-line chemotherapy. Lesion 7 was a good responder misclassified as R- by the algorithm (CR at 6 months).

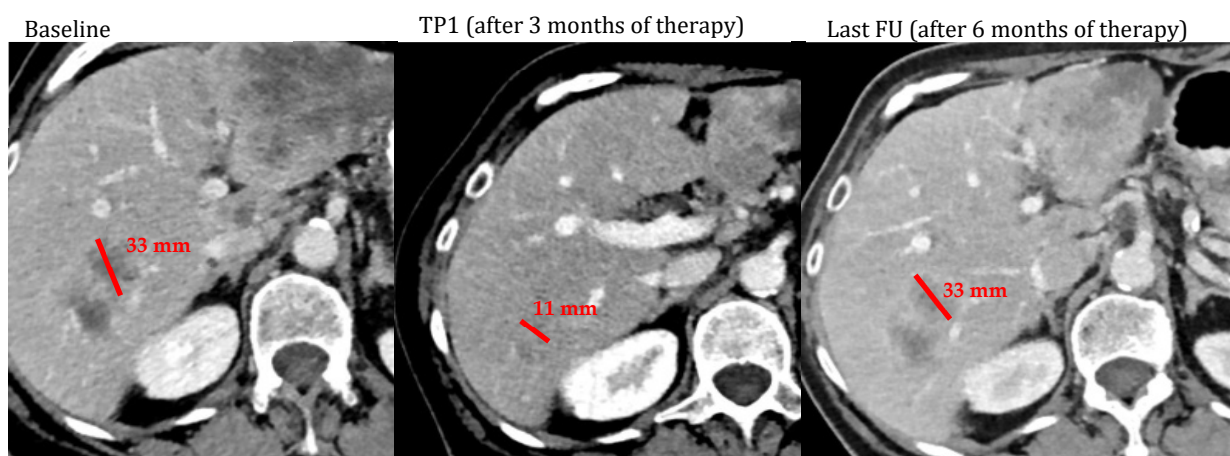

(a)

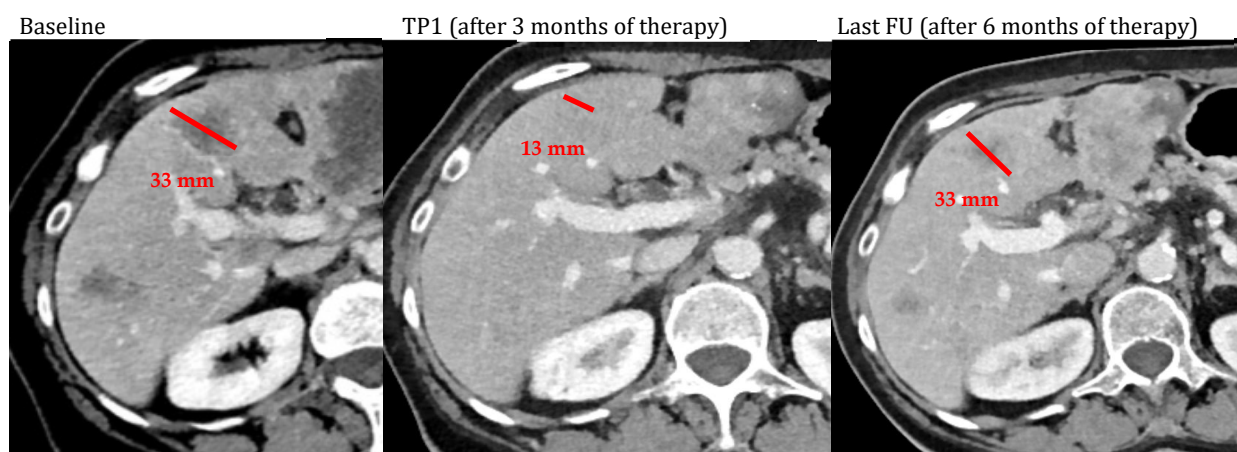

(b)

**Figure S5.** (a) Lesion 4 in patient 1010 at baseline, TP1 and last FU during first-line chemotherapy. Lesion 4 was a bad responder misclassified as R+ by the algorithm (PD at 6 months). To note that a PR was recorded at TP1. (b) Lesion 7 in patient 1010 at baseline, TP1 and last FU during first-line chemotherapy. Lesion 4 was a bad responder misclassified as R+ by the algorithm (PD at 6 months). To note that a PR was recorded at TP1. The lesion was almost indistinguishable from normal liver parenchyma at TP1, being a possible source for incorrect segmentation.
